# Supplementary material for: A local dark tea – Liubao tea – extract exhibits remarkable performance in oral tissue regeneration, inflammation relief and oral microbiota reconstruction
Source: Royal Society of Chemistry journal article supplement (doi:10.1039/d3fo02277c), 2023-01-01
Supplement: d3fo02277c1.pdf [file d3fo02277c1.pdf]

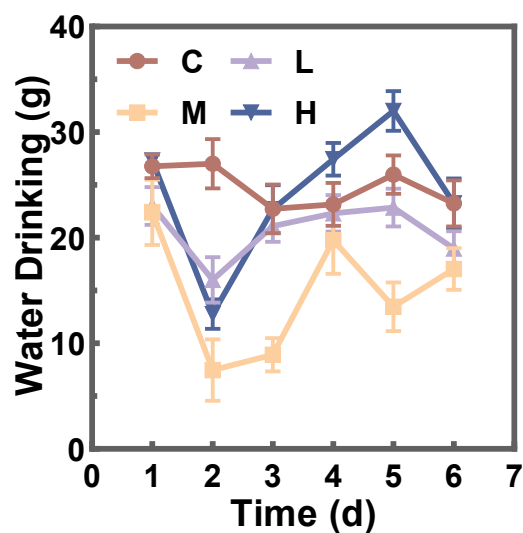

**Figure S1.** The change of water drinking consumption of each group. Error bars with different letters indicate a significant difference according to one-way ANOVA with Duncan and LSD test ( $p < 0.05$ ).

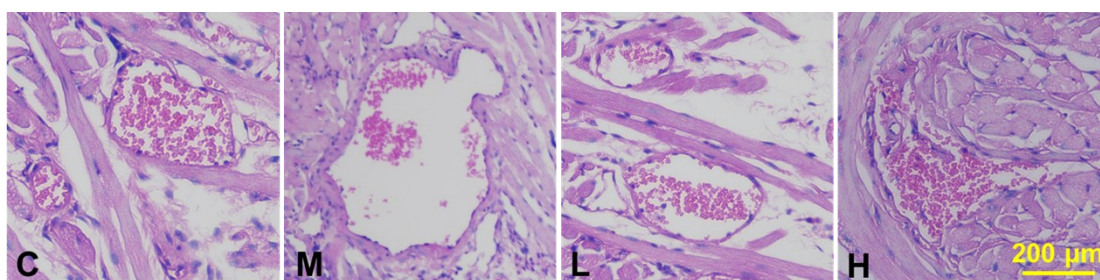

**Figure S2.** Blood vessels in the H&E staining images of tongue tissues in each group.
